# Supplementary material for: Hierarchical Ni3S2 nanosheets coated on Co3O4 nanoneedle arrays on 3D nickel foam as an efficient electrocatalyst for the oxygen evolution reaction
Source: Royal Society of Chemistry journal article supplement (doi:10.1039/c7ta11104e), 2018-01-01
Supplement: c7ta11104e1.pdf [file c7ta11104e1.pdf]

# Hierarchical $\text{Ni}_3\text{S}_2$ nanosheets coated on $\text{Co}_3\text{O}_4$ nanoneedles arrays on 3D nickel foam as efficient electrocatalyst for oxygen evolution reaction

Yaqiong Gong,<sup>ab</sup> Zhoufeng Xu,<sup>ab</sup> Hailong Pan,<sup>ab</sup> Yu Lin,<sup>ab</sup> Yang Zhi,<sup>ab</sup> Xiaoqiang Du<sup>ab\*</sup>

<sup>a</sup> School of Chemical Engineering and Technology, North University of China, Taiyuan 030051, People's Republic of China.

<sup>b</sup> State Key Laboratory of Structural Chemistry, Fujian Institute of Research on the Structure of Matter, Chinese Academy of Sciences, Fuzhou, Fujian 350002.

E-mail: duxq16@nuc.edu.cn

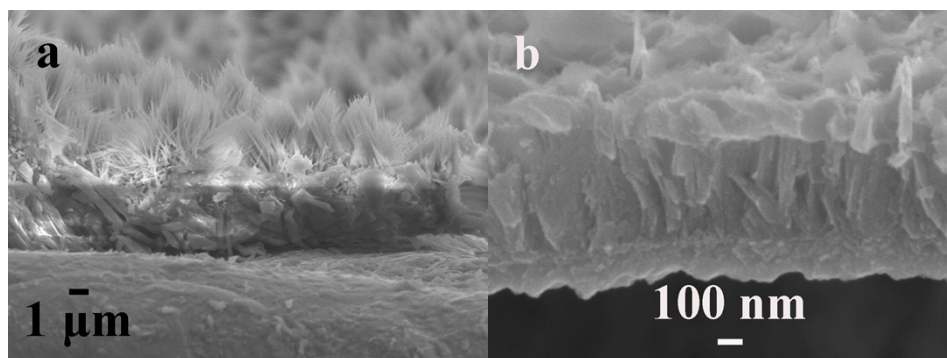

Fig. S1. A side view SEM image of (a)  $\text{Co}_3\text{O}_4/\text{NF}$  and (b)  $\text{Co}_3\text{O}_4@\text{Ni}_3\text{S}_2/\text{NF}$

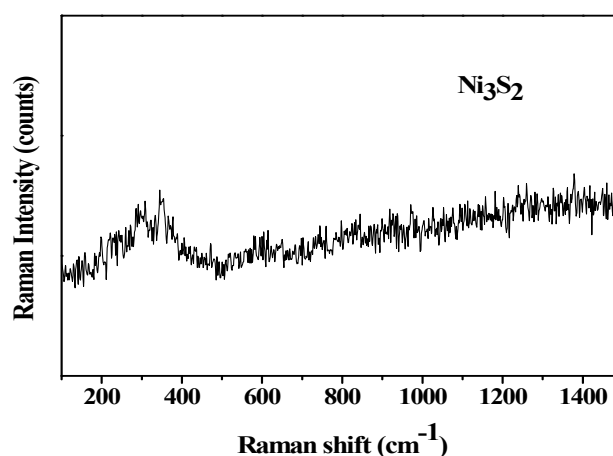

Fig. S2. the Raman intensity of  $\text{Ni}_3\text{S}_2/\text{NF}$ .

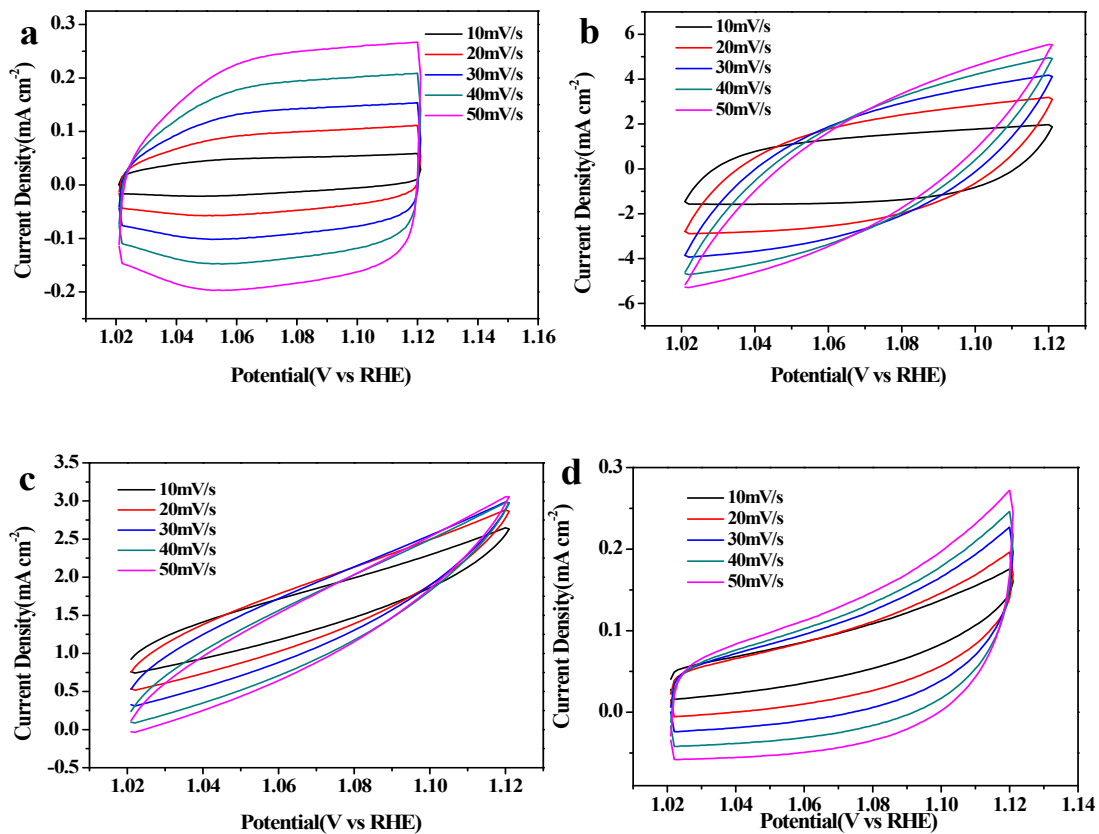

Fig. S3. Electrochemical double-layer capacitance measurements. The cyclic voltammograms (CVs) measurements with various scan rates for  $\text{Co}_3\text{O}_4$  precursor/NF(a)  $\text{Co}_3\text{O}_4$ /NF (b)  $\text{Ni}_3\text{S}_2$ /NF (c)  $\text{Co}_3\text{O}_4@/\text{Ni}_3\text{S}_2$ /NF (d) in 1.0 M KOH.

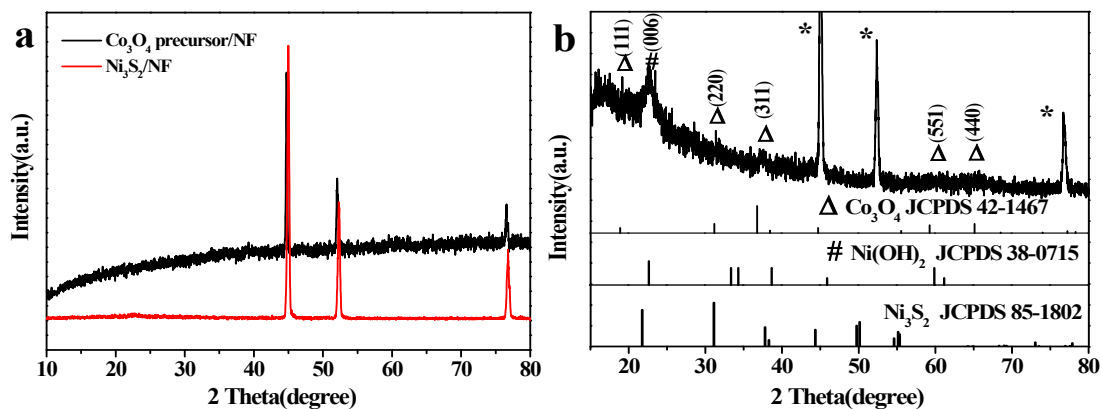

Fig. S4. The XRD spectra of  $\text{Co}_3\text{O}_4$ /NF and  $\text{Ni}_3\text{S}_2$ /NF a),  $\text{Co}_3\text{O}_4@/\text{Ni}_3\text{S}_2$ /NF after OER stability test.

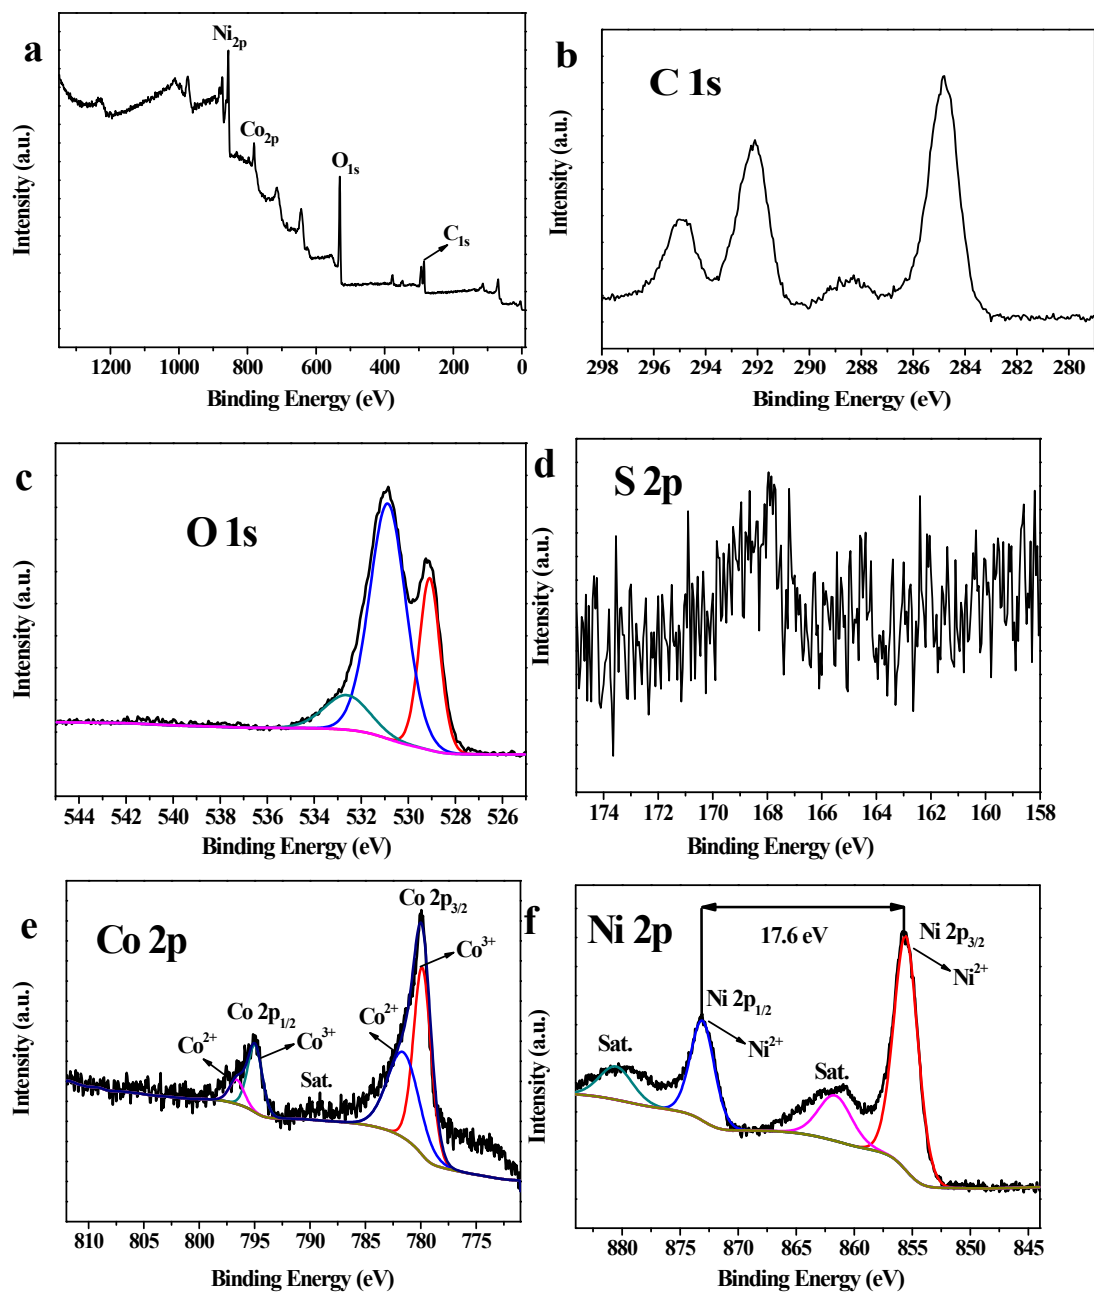

Fig. S5. The XPS spectra of  $\text{Co}_3\text{O}_4@\text{Ni}_3\text{S}_2/\text{NF}$  after OER stability test: (a) survey, (b) C 1s, (c) O 1s, (d) S 2p, (e) Co 2p and (f) Ni 2p regions.

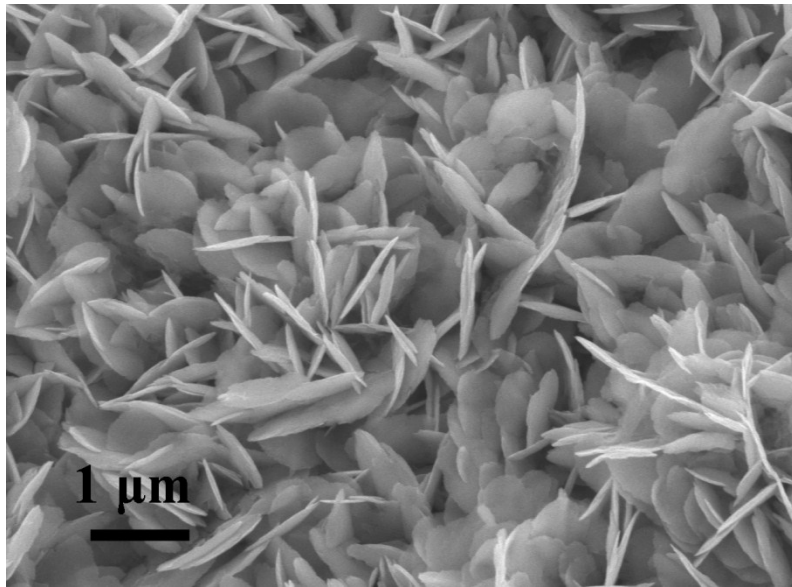

**Fig. S6. SEM image of Co<sub>3</sub>O<sub>4</sub>@Ni<sub>3</sub>S<sub>2</sub>/NF after OER stability test.**
